# Supplementary material for: The Effect of Methyl-Derivatives of Flavanone on MCP-1, MIP-1β, RANTES, and Eotaxin Release by Activated RAW264.7 Macrophages
Source: MDPI journal article supplement (doi:10.3390/molecules29102239), 2024-05-10

# The Effect of Methyl-Derivatives of Flavanone on MCP-1, MIP-1 $\beta$ , RANTES, and Eotaxin Release by Activated RAW264.7 Macrophages

Małgorzata Klósek <sup>1,\*</sup>, Anna Kurek-Górecka <sup>2,\*</sup>, Radosław Balwierz <sup>3</sup>, Agnieszka Krawczyk-Łebek <sup>4</sup>, Edyta Kostrzewa-Susłow <sup>4</sup>, Joanna Bronikowska <sup>1</sup>, Dagmara Jaworska <sup>1</sup> and Zenon P. Czuba <sup>1</sup>

<sup>1</sup> Department of Microbiology and Immunology, Faculty of Medical Sciences, Medical University of Silesia in Katowice, Jordana 19, 41-808 Zabrze, Poland; jbronikowska@sum.edu.pl (J.B.); djaworska@sum.edu.pl (D.J.); zczuba@sum.edu.pl (Z.P.C.)

<sup>2</sup> Department of Community Pharmacy, Faculty of Pharmaceutical Sciences in Sosnowiec, Medical University of Silesia in Katowice, St Kasztanowa 3, 41-200 Sosnowiec, Poland

<sup>3</sup> Institute of Chemistry, University of Opole, Oleska 48, 45-052 Opole, Poland; radoslaw.balwierz@uni.opole.pl

<sup>4</sup> Department of Food Chemistry and Biocatalysis, University of Environmental and Life Sciences, Norwida 25, 50-375 Wrocław, Poland; agnieszka.krawczyk-lebek@upwr.edu.pl (A.K.-Ł.); edyta.kostrzewa-suslow@upwr.edu.pl (E.K.-S.)

\* Correspondence: mklosek@sum.edu.pl (M.K.); akurekgorecka@sum.edu.pl (A.K.-G.); Tel./Fax: +48-322-722-554 (M.K.)

**Citation:** Klósek, M.; Kurek-Górecka, A.; Balwierz, R.; Krawczyk-Łebek, A.; Kostrzewa-Susłow, E.; Bronikowska, J.; Jaworska, D.; Czuba, Z.P. The Effect of Methyl-Derivatives of Flavanone on MCP-1, MIP-1 $\beta$ , RANTES, and Eotaxin Release by Activated RAW264.7 Macrophages. *Molecules* **2024**, *29*, 2239. <https://doi.org/10.3390/molecules29102239>

Academic Editor: Aziz Hichami

Received: 11 March 2024

Revised: 1 May 2024

Accepted: 8 May 2024

Published: 10 May 2024

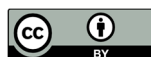

**Copyright:** © 2024 by the authors. Licensee MDPI, Basel, Switzerland. This article is an open access article distributed under the terms and conditions of the Creative Commons Attribution (CC BY) license (<https://creativecommons.org/licenses/by/4.0/>).

## Content

**Table S1.** Results of pair-wise comparisons of test compounds on the production MCP-1 in compared to control and flavanone in LPS stimulated RAW264.1 cells (n=3). Statistical significance was analysed using Fisher's LSD test. Results marked in red are statistically significant in Fisher's LSD test. Multivariate Tests of Significance (F = 8.20, p < 0.05).

**Table S2.** Results of pair-wise comparisons of test compounds on the production MIP-1 $\beta$  in compared to control and flavanone in LPS stimulated RAW264.1 cells (n=3). Statistical significance was analysed using Fisher's LSD test. Results marked in red are statistically significant in Fisher's LSD test. Multivariate Tests of Significance (F = 8.20, p < 0.05).

**Table S3.** Results of pair-wise comparisons of test compounds on the production RANTES in compared to control and flavanone in LPS stimulated RAW264.1 cells (n=3). Statistical significance was analysed using Fisher's LSD test. Results marked in red are statistically significant in Fisher's LSD test. Multivariate Tests of Significance (F = 8.20, p < 0.05).

**Table S4.** Results of pair-wise comparisons of test compounds on the production eotaxin in compared to control and flavanone in LPS stimulated RAW264.1 cells (n=3). Statistical significance was analysed using Fisher's LSD test. Results marked in red are statistically significant in Fisher's LSD test. Multivariate Tests of Significance (F = 8.20, p < 0.05).

**Table S1.** Results of pair-wise comparisons of test compounds on the production MCP-1 in compared to control and flavanone in LPS stimulated RAW264.1 cells (n=3). Statistical significance was analysed using Fisher's LSD test. Results marked in red are statistically significant in Fisher's LSD test. Multivariate Tests of Significance (F = 8.20, p < 0.05).

LSD test; variable MCP-1

Probabilities for Post Hoc Tests

Cell Error: Between MS = 451,66, df = 26,000

| No. | sample              | {1}      | {2}      | {3}      | {4}      | {5}      | {6}      | {7}      | {8}      | {9}      | {10}     | {11}     | {12}     | {13}     |
|-----|---------------------|----------|----------|----------|----------|----------|----------|----------|----------|----------|----------|----------|----------|----------|
| 1   | DMSO + LPS (5B, 6B) |          | 0.000009 | 0.000008 | 0.000043 | 0.000009 | 1.000000 | 0.007050 | 0.860102 | 0.081197 | 0.004759 | 1.000000 | 0.201345 | 0.983816 |
| 2   | 5B 1µM + LPS        | 0.000009 |          | 0.949250 | 0.569442 | 0.992730 | 0.000009 | 0.016789 | 0.000015 | 0.001108 | 0.024172 | 0.000009 | 0.000000 | 0.000009 |
| 3   | 5B 20µM + LPS       | 0.000008 | 0.949250 |          | 0.527481 | 0.956507 | 0.000008 | 0.014486 | 0.000013 | 0.000939 | 0.020939 | 0.000008 | 0.000000 | 0.000008 |
| 4   | 6B 1µM + LPS        | 0.000043 | 0.569442 | 0.527481 |          | 0.563333 | 0.000043 | 0.058434 | 0.000069 | 0.004718 | 0.080639 | 0.000043 | 0.000001 | 0.000041 |
| 5   | 6B 20µM + LPS       | 0.000009 | 0.992730 | 0.956507 | 0.563333 |          | 0.000009 | 0.016440 | 0.000015 | 0.001082 | 0.023683 | 0.000009 | 0.000000 | 0.000009 |
| 6   | DMSO + LPS (7B, 8B) | 1.000000 | 0.000009 | 0.000008 | 0.000043 | 0.000009 |          | 0.007050 | 0.860102 | 0.081197 | 0.004759 | 1.000000 | 0.201345 | 0.983816 |
| 7   | 7B 1µM + LPS        | 0.007050 | 0.016789 | 0.014486 | 0.058434 | 0.016440 | 0.007050 |          | 0.010768 | 0.276709 | 0.872748 | 0.007050 | 0.000252 | 0.006711 |
| 8   | 7B 20µM + LPS       | 0.860102 | 0.000015 | 0.000013 | 0.000069 | 0.000015 | 0.860102 | 0.010768 |          | 0.113838 | 0.007331 | 0.860102 | 0.148538 | 0.844212 |
| 9   | 8B 1µM + LPS        | 0.081197 | 0.001108 | 0.000939 | 0.004718 | 0.001082 | 0.081197 | 0.276709 | 0.113838 |          | 0.214345 | 0.081197 | 0.004334 | 0.078014 |
| 10  | 8B 20µM + LPS       | 0.004759 | 0.024172 | 0.020939 | 0.080639 | 0.023683 | 0.004759 | 0.872748 | 0.007331 | 0.214345 |          | 0.004759 | 0.000165 | 0.004526 |
| 11  | DMSO + LPS (FL)     | 1.000000 | 0.000009 | 0.000008 | 0.000043 | 0.000009 | 1.000000 | 0.007050 | 0.860102 | 0.081197 | 0.004759 |          | 0.201345 | 0.983816 |
| 12  | fl 1µM + LPS        | 0.201345 | 0.000000 | 0.000000 | 0.000001 | 0.000000 | 0.201345 | 0.000252 | 0.148538 | 0.004334 | 0.000165 | 0.201345 |          | 0.208256 |
| 13  | fl 20µM + LPS       | 0.983816 | 0.000009 | 0.000008 | 0.000041 | 0.000009 | 0.983816 | 0.006711 | 0.844212 | 0.078014 | 0.004526 | 0.983816 | 0.208256 |          |

**Table S2.** Results of pair-wise comparisons of test compounds on the production MIP-1 $\beta$  in compared to control and flavanone in LPS stimulated RAW264.1 cells (n=3). Statistical significance was analysed using Fisher's LSD test. Results marked in red are statistically significant in Fisher's LSD test. Multivariate Tests of Significance (F = 8.20, p < 0.05).

| LSD test; variable MIP-1 $\beta$ |                                         |          |          |          |          |          |          |          |          |          |          |          |          |          |
|----------------------------------|-----------------------------------------|----------|----------|----------|----------|----------|----------|----------|----------|----------|----------|----------|----------|----------|
| Probabilities for Post Hoc Tests |                                         |          |          |          |          |          |          |          |          |          |          |          |          |          |
| Cell No.                         | Error: Between MS = 8,6248, df = 26,000 |          |          |          |          |          |          |          |          |          |          |          |          |          |
|                                  | sample                                  | {1}      | {2}      | {3}      | {4}      | {5}      | {6}      | {7}      | {8}      | {9}      | {10}     | {11}     | {12}     | {13}     |
| 1                                | DMSO + LPS (5B, 6B)                     |          | 0.000497 | 0.000000 | 0.024173 | 0.030536 | 1.000000 | 0.014348 | 0.095306 | 0.164727 | 0.008244 | 1.000000 | 0.313226 | 0.243199 |
| 2                                | 5B 1 $\mu$ M + LPS                      | 0.000497 |          | 0.000086 | 0.125688 | 0.103277 | 0.000497 | 0.000001 | 0.000005 | 0.000012 | 0.000000 | 0.000497 | 0.006679 | 0.000021 |
| 3                                | 5B 20 $\mu$ M + LPS                     | 0.000000 | 0.000086 |          | 0.000001 | 0.000001 | 0.000000 | 0.000000 | 0.000000 | 0.000000 | 0.000000 | 0.000000 | 0.000000 | 0.000000 |
| 4                                | 6B 1 $\mu$ M + LPS                      | 0.024173 | 0.125688 | 0.000001 |          | 0.916189 | 0.024173 | 0.000032 | 0.000337 | 0.000739 | 0.000017 | 0.024173 | 0.183783 | 0.001355 |
| 5                                | 6B 20 $\mu$ M + LPS                     | 0.030536 | 0.103277 | 0.000001 | 0.916189 |          | 0.030536 | 0.000042 | 0.000445 | 0.000973 | 0.000023 | 0.030536 | 0.219120 | 0.001776 |
| 6                                | DMSO + LPS (7B, 8B)                     | 1.000000 | 0.000497 | 0.000000 | 0.024173 | 0.030536 |          | 0.014348 | 0.095306 | 0.164727 | 0.008244 | 1.000000 | 0.313226 | 0.243199 |
| 7                                | 7B 1 $\mu$ M + LPS                      | 0.014348 | 0.000001 | 0.000000 | 0.000032 | 0.000042 | 0.014348 |          | 0.379970 | 0.243065 | 0.815366 | 0.014348 | 0.001149 | 0.164629 |
| 8                                | 7B 20 $\mu$ M + LPS                     | 0.095306 | 0.000005 | 0.000000 | 0.000337 | 0.000445 | 0.095306 | 0.379970 |          | 0.765542 | 0.269191 | 0.095306 | 0.010466 | 0.595944 |
| 9                                | 8B 1 $\mu$ M + LPS                      | 0.164727 | 0.000012 | 0.000000 | 0.000739 | 0.000973 | 0.164727 | 0.243065 | 0.765542 |          | 0.164513 | 0.164727 | 0.020948 | 0.815677 |
| 10                               | 8B 20 $\mu$ M + LPS                     | 0.008244 | 0.000000 | 0.000000 | 0.000017 | 0.000023 | 0.008244 | 0.815366 | 0.269191 | 0.164513 |          | 0.008244 | 0.000625 | 0.107743 |
| 11                               | DMSO + LPS (FL)                         | 1.000000 | 0.000497 | 0.000000 | 0.024173 | 0.030536 | 1.000000 | 0.014348 | 0.095306 | 0.164727 | 0.008244 |          | 0.313226 | 0.243199 |
| 12                               | fl 1 $\mu$ M + LPS                      | 0.313226 | 0.006679 | 0.000000 | 0.183783 | 0.219120 | 0.313226 | 0.001149 | 0.010466 | 0.020948 | 0.000625 | 0.313226 |          | 0.035152 |
| 13                               | fl 20 $\mu$ M + LPS                     | 0.243199 | 0.000021 | 0.000000 | 0.001355 | 0.001776 | 0.243199 | 0.164629 | 0.595944 | 0.815677 | 0.107743 | 0.243199 | 0.035152 |          |

**Table S3.** Results of pair-wise comparisons of test compounds on the production RANTES in compared to control and flavanone in LPS stimulated RAW264.1 cells (n=3). Statistical significance was analysed using Fisher's LSD test. Results marked in red are statistically significant in Fisher's LSD test. Multivariate Tests of Significance (F = 8.20, p < 0.05).

LSD test; variable RANTES  
 Probabilities for Post Hoc Tests  
 Error: Between MS = 231,90, df = 26,000

| Cell No. | sample              | {1}      | {2}      | {3}      | {4}      | {5}      | {6}      | {7}      | {8}      | {9}      | {10}     | {11}     | {12}     | {13}     |
|----------|---------------------|----------|----------|----------|----------|----------|----------|----------|----------|----------|----------|----------|----------|----------|
| 1        | DMSO + LPS (5B, 6B) |          | 0.329811 | 0.001264 | 0.014710 | 0.213420 | 1.000000 | 0.018808 | 0.171286 | 0.417540 | 0.006214 | 1.000000 | 0.788692 | 0.112843 |
| 2        | 5B 1µM + LPS        | 0.329811 |          | 0.014408 | 0.117247 | 0.779896 | 0.329811 | 0.001701 | 0.023848 | 0.080775 | 0.000505 | 0.329811 | 0.217483 | 0.014022 |
| 3        | 5B 20µM + LPS       | 0.001264 | 0.014408 |          | 0.325525 | 0.027235 | 0.001264 | 0.000002 | 0.000032 | 0.000148 | 0.000001 | 0.001264 | 0.000629 | 0.000017 |
| 4        | 6B 1µM + LPS        | 0.014710 | 0.117247 | 0.325525 |          | 0.192522 | 0.014710 | 0.000025 | 0.000443 | 0.001989 | 0.000007 | 0.014710 | 0.007782 | 0.000240 |
| 5        | 6B 20µM + LPS       | 0.213420 | 0.779896 | 0.027235 | 0.192522 |          | 0.213420 | 0.000825 | 0.012534 | 0.045649 | 0.000241 | 0.213420 | 0.134127 | 0.007202 |
| 6        | DMSO + LPS (7B, 8B) | 1.000000 | 0.329811 | 0.001264 | 0.014710 | 0.213420 |          | 0.018808 | 0.171286 | 0.417540 | 0.006214 | 1.000000 | 0.788692 | 0.112843 |
| 7        | 7B 1µM + LPS        | 0.018808 | 0.001701 | 0.000002 | 0.000025 | 0.000825 | 0.018808 |          | 0.281896 | 0.104542 | 0.641034 | 0.018808 | 0.034223 | 0.395044 |
| 8        | 7B 20µM + LPS       | 0.171286 | 0.023848 | 0.000032 | 0.000443 | 0.012534 | 0.171286 | 0.281896 |          | 0.564828 | 0.128360 | 0.171286 | 0.266255 | 0.816784 |
| 9        | 8B 1µM + LPS        | 0.417540 | 0.080775 | 0.000148 | 0.001989 | 0.045649 | 0.417540 | 0.104542 | 0.564828 |          | 0.040707 | 0.417540 | 0.584972 | 0.421252 |
| 10       | 8B 20µM + LPS       | 0.006214 | 0.000505 | 0.000001 | 0.000007 | 0.000241 | 0.006214 | 0.641034 | 0.128360 | 0.040707 |          | 0.006214 | 0.011841 | 0.192937 |
| 11       | DMSO + LPS (FL)     | 1.000000 | 0.329811 | 0.001264 | 0.014710 | 0.213420 | 1.000000 | 0.018808 | 0.171286 | 0.417540 | 0.006214 |          | 0.788692 | 0.112843 |
| 12       | fl 1µM + LPS        | 0.788692 | 0.217483 | 0.000629 | 0.007782 | 0.134127 | 0.788692 | 0.034223 | 0.266255 | 0.584972 | 0.011841 | 0.788692 |          | 0.182341 |
| 13       | fl 20µM + LPS       | 0.112843 | 0.014022 | 0.000017 | 0.000240 | 0.007202 | 0.112843 | 0.395044 | 0.816784 | 0.421252 | 0.192937 | 0.112843 | 0.182341 |          |

**Table S4.** Results of pair-wise comparisons of test compounds on the production eotaxin in compared to control and flavanone in LPS stimulated RAW264.1 cells (n=3). Statistical significance was analysed using Fisher's LSD test. Results marked in red are statistically significant in Fisher's LSD test. Multivariate Tests of Significance (F = 8.20, p < 0.05).

| LSD test; variable eotaxin       |                                         |          |          |          |          |          |          |          |          |          |          |          |          |          |      |
|----------------------------------|-----------------------------------------|----------|----------|----------|----------|----------|----------|----------|----------|----------|----------|----------|----------|----------|------|
| Probabilities for Post Hoc Tests |                                         |          |          |          |          |          |          |          |          |          |          |          |          |          |      |
| Cell No.                         | Error: Between MS = 111,89, df = 26,000 | sample   | {1}      | {2}      | {3}      | {4}      | {5}      | {6}      | {7}      | {8}      | {9}      | {10}     | {11}     | {12}     | {13} |
| 1                                | DMSO + LPS (5B, 6B)                     |          | 0.000505 | 0.001030 | 0.012593 | 0.000100 | 1.000000 | 0.426578 | 0.235467 | 0.508481 | 0.105781 | 1.000000 | 0.934649 | 0.550337 |      |
| 2                                | 5B 1µM + LPS                            | 0.000505 |          | 0.784974 | 0.208330 | 0.542086 | 0.000505 | 0.003949 | 0.000021 | 0.002807 | 0.000006 | 0.000505 | 0.000407 | 0.000103 |      |
| 3                                | 5B 20µM + LPS                           | 0.001030 | 0.784974 |          | 0.319671 | 0.379801 | 0.001030 | 0.007725 | 0.000043 | 0.005545 | 0.000013 | 0.001030 | 0.000832 | 0.000213 |      |
| 4                                | 6B 1µM + LPS                            | 0.012593 | 0.208330 | 0.319671 |          | 0.067490 | 0.012593 | 0.072398 | 0.000615 | 0.054918 | 0.000184 | 0.012593 | 0.010373 | 0.002912 |      |
| 5                                | 6B 20µM + LPS                           | 0.000100 | 0.542086 | 0.379801 | 0.067490 |          | 0.000100 | 0.000826 | 0.000004 | 0.000579 | 0.000001 | 0.000100 | 0.000080 | 0.000020 |      |
| 6                                | DMSO + LPS (7B, 8B)                     | 1.000000 | 0.000505 | 0.001030 | 0.012593 | 0.000100 |          | 0.426578 | 0.235467 | 0.508481 | 0.105781 | 1.000000 | 0.934649 | 0.550337 |      |
| 7                                | 7B 1µM + LPS                            | 0.426578 | 0.003949 | 0.007725 | 0.072398 | 0.000826 | 0.426578 |          | 0.053552 | 0.891874 | 0.019784 | 0.426578 | 0.381355 | 0.169558 |      |
| 8                                | 7B 20µM + LPS                           | 0.235467 | 0.000021 | 0.000043 | 0.000615 | 0.000004 | 0.235467 | 0.053552 |          | 0.070658 | 0.648492 | 0.235467 | 0.268082 | 0.547560 |      |
| 9                                | 8B 1µM + LPS                            | 0.508481 | 0.002807 | 0.005545 | 0.054918 | 0.000579 | 0.508481 | 0.891874 | 0.070658 |          | 0.026867 | 0.508481 | 0.458069 | 0.213382 |      |
| 10                               | 8B 20µM + LPS                           | 0.105781 | 0.000006 | 0.000013 | 0.000184 | 0.000001 | 0.105781 | 0.019784 | 0.648492 | 0.026867 |          | 0.105781 | 0.123265 | 0.294196 |      |
| 11                               | DMSO + LPS (FL)                         | 1.000000 | 0.000505 | 0.001030 | 0.012593 | 0.000100 | 1.000000 | 0.426578 | 0.235467 | 0.508481 | 0.105781 |          | 0.934649 | 0.550337 |      |
| 12                               | fl 1µM + LPS                            | 0.934649 | 0.000407 | 0.000832 | 0.010373 | 0.000080 | 0.934649 | 0.381355 | 0.268082 | 0.458069 | 0.123265 | 0.934649 |          | 0.605857 |      |
| 13                               | fl 20µM + LPS                           | 0.550337 | 0.000103 | 0.000213 | 0.002912 | 0.000020 | 0.550337 | 0.169558 | 0.547560 | 0.213382 | 0.294196 | 0.550337 | 0.605857 |          |      |

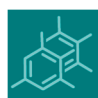

Supplement: s1 [file s1]
